# Supplementary material for: Influence of a hydrodynamic environment on chain rigidity, liquid crystallinity, absorptivity, and photoluminescence of hydrogen-bonding-assisted helical poly(phenylacetylene)
Source: Royal Society of Chemistry journal article supplement (doi:10.1039/c6ra01940d), 2016-01-01

# Electronic Supplementary Information

## Influence of Hydrodynamic Environment on Chain Rigidity, Liquid Crystallinity, Absorptivity, and Photoluminescence of Hydrogen-Bonding-Assisted Helical Poly(phenylacetylene)

Young-Jae Jin,<sup>a</sup> Hyojin Kim,<sup>a, b</sup> Mari Miyata,<sup>c</sup> Guanwu Yin,<sup>c</sup> Takashi Kaneko,<sup>\*c</sup> Masahiro Teraguchi,<sup>c</sup> Toshiki Aoki<sup>\*c</sup> and Giseop Kwak<sup>\*a</sup>

<sup>a</sup> School of Applied Chemical Engineering, Major in Polymer Science and Engineering, Kyungpook National University 1370 Sankyuk-dong, Buk-ku, Daegu 702–701, Korea.

\*E-mail: [gkwak@knu.ac.kr](mailto:gkwak@knu.ac.kr)

<sup>b</sup> Daegu Technopark Nano Convergence Practical Application Center, 891–5 Daecheon-dong, Dalseo-ku, Daegu 704–801, Korea.

<sup>c</sup> Department of Chemistry and Chemical Engineering, Graduate School of Science and Technology, and Center for Transdisciplinary Research, Niigata University, Ikarashi 2-8050, Nishi-ku, Niigata 950-2181, Japan.

\*E-mail: [toshaoki@eng.niigata-u.ac.jp](mailto:toshaoki@eng.niigata-u.ac.jp)

**Table S1** Properties of the solvents used in this study

| properties                                                              | solvents   |         |      |      |
|-------------------------------------------------------------------------|------------|---------|------|------|
|                                                                         | piperidine | toluene | THF  | DMSO |
| solubility parameter ( $\delta$ , MPa <sup>1/2</sup> ) <sup>a</sup>     | 17.8       | 18.2    | 19.4 | 26.4 |
| hydrogen bonding<br>acceptor strength ( $pK_{\text{HB}}$ ) <sup>b</sup> | 2.35       | -0.44   | 1.26 | 2.49 |

<sup>a</sup>Defined by the Hildebrand solubility parameter; <sup>b</sup>Reference values<sup>6</sup>

**Fig. S1** HR-TEM images of cast films from toluene and piperidine solution.

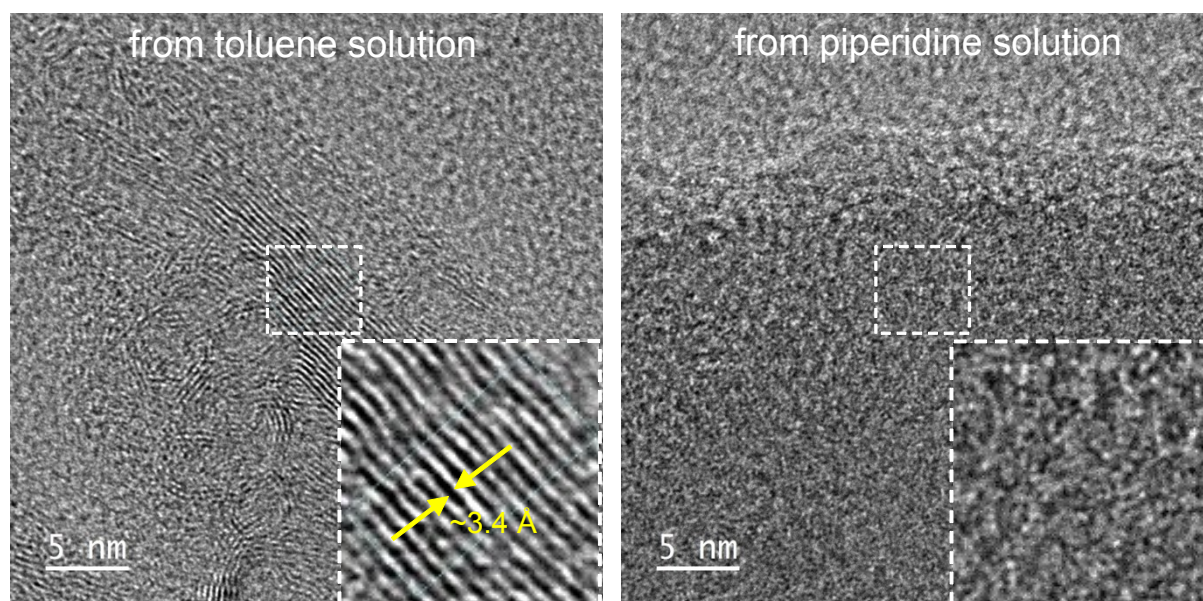

**Fig. S2** DSC thermograms of cast films from a) toluene and b) piperidine solution during heating. (heat flow rate  $\approx 10 \text{ min } ^\circ\text{C}^{-1}$ , under nitrogen gas)

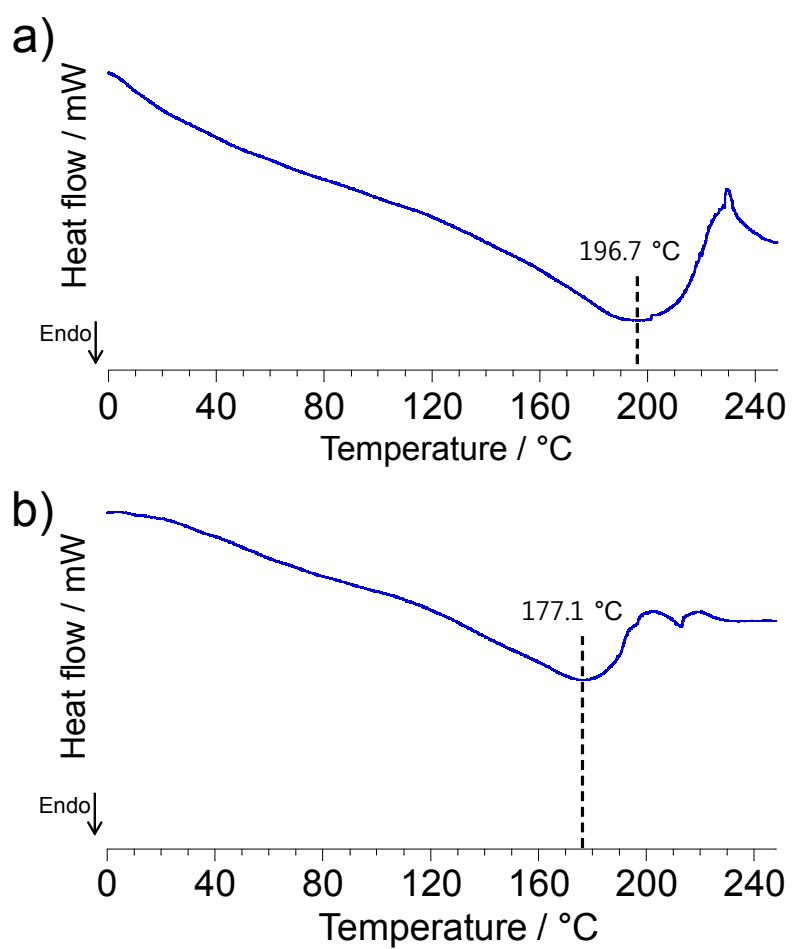

Supplement: c6ra01940d1.pdf [file c6ra01940d1.pdf]
